# Supplementary material
Source: Research Square preprint supplement (doi:10.21203/rs.3.rs-8729974/v1)
Supplement: Supplementary file 1 [file 51857290853afa4fef05d7d8.docx]

### ****Standardized Session Scripts (4 Techniques)****

**Project:** Relaxation & Music of the Plants

**Use:** Same script for all experimental arms; B1 and B2 add music according to SOP; B3 without music.

**Target duration:** 15 minutes

**Format:** Calm voice, slow pace, frequent pauses; simple language, not clinically suggestive; suitable for lower secondary school students.

### ****Conducting Standards (valid for all scripts)****

• **Posture:** Seated, back supported by the chair, feet on the floor, hands resting on thighs; eyes closed or half-closed.• **Environment:** Doors/windows kept stable, dim lights if possible; no movement during the session.• **Breathing:** 4–5 seconds inhale, 4–5 seconds exhale (respiratory coherence); do not force.• **Notes for study arms:** ◦ **B1 (Relaxation + Music of the Plants):** Start the device, 30–60″ silent calibration; maintain standard dB level. ◦ **B2 (Relaxation + Pre-recorded Music):** Start the same standard track (WAV master); dB level equal to B1 (±2 dB); continuous loop. ◦ **B3 (Relaxation Only):** No music; respect the same timing.• **Fidelity:** Record in the checklist session number, duration, dB (if measured), interruptions, participation, and any events.• **Safety:** If someone wishes to stop, they raise a hand and may remain seated in quiet listening.

**Typical structure 15′ (for each script):**0–1′ Welcome and posture → 1–4′ Breathing → 4–6′ Short body scan → 6–12′ Specific technique → 12–14′ Return → 14–15′ Closing.

### ****Script 1 – Mindfulness****

**“Gentle attention to breath, body, and thoughts”**

**Duration:** 15′**Objective:** Cultivate non-judgmental awareness of breath, sensations, and thoughts.

**Guided text**

**0–1′ Welcome and posture**“Choose a comfortable position… back supported, feet on the floor… If you like, close your eyes or keep them half-closed. Bring attention to the contact of the body with the chair and the floor.”

**1–4′ Breathing**“Now bring attention to the breath. Inhale, mentally counting to four… exhale, counting to four… Let the breath flow naturally, soft and regular. If the mind wanders, that’s normal: when you notice it, gently return to the breath.”

**4–6′ Short body scan**“Move attention, with curiosity, from the top of the head downward. Notice forehead, eyes, jaw… neck and shoulders… arms and hands… chest and abdomen… pelvis, legs, and feet. Simply observe sensations as they are.”

**6–10′ Sensory mindfulness (anchors)**“With eyes closed, silently notice: sensations in the body, points of contact with the chair or clothes; then sounds in the room; finally the rhythm of breathing in the abdomen. If something distracts you, gently return to the breath.”

**10–12′ Thoughts and emotions as clouds**“Imagine thoughts passing like clouds in the sky. You notice them and let them go, returning to the breath. If an emotion appears, recognize it without judgment.”

**12–14′ Return**“Bring attention back to the feet, slowly move the fingers. Take a fuller breath, gently stretch arms and back.”

**14–15′ Closing**“When you’re ready, open your eyes. Notice how you feel, without judgment.”

**Operational notes**• Low, steady voice; short but real pauses between phrases.• Avoid specific imagery; focus on present-moment experience.

### ****Script 2 – Autogenic Training (school version)****

**Duration:** 15′**Objective:** Induce bodily calm through standard formulas.

**Guided text**

**0–1′ Welcome and posture**“Sit comfortably, eyes closed or half-closed. Let the shoulders relax.”

**1–2′ Initial calm**“I am calm and relaxed. (pause) Very calm.”

**2–5′ Heaviness**“My arms are heavy… very heavy… (pause) My legs are heavy… very heavy… (pause) My whole body is pleasantly heavy.”

**5–8′ Warmth**“My arms are warm… very warm… (pause) My legs are warm… very warm… (pause) I am enveloped in a pleasant warmth.”

**8–10′ Breathing**“My breathing is calm and regular… it breathes by itself.”

**10–11′ Heart**“My heart beats calmly and regularly.”

**11–12′ Solar plexus**“My abdomen is pleasantly warm.”

**12–13′ Cool forehead**“My forehead is cool and clear.”

**13–14′ Return (counter-formulas)**“Move hands and feet, take a deeper breath.”

**14–15′ Closing**“Open your eyes and notice how you feel.”

**Operational notes**• Simple tone, slow rhythm.• If discomfort appears, return to breathing and cool-forehead formula.

### ****Script 3 – Progressive Muscle Relaxation (PMR – brief seated version)****

**Duration:** 15′**Objective:** Recognize and release tension through gentle tense–release cycles.

**Guided text**

**0–1′ Posture and breathing**“Sit comfortably, breathe slowly.”

**Muscle sequence (1 cycle each)**

**Hands/forearms (1–3′)**“Clench fists for 5 seconds… release… notice warmth.”

**Biceps (3–4′)**“Bend elbows slightly… release.”

**Shoulders/neck (4–5′)**“Lift shoulders… release.”

**Face/jaw (5–6′)**“Gently tense the face… release.”

**Chest/back (6–7′)**“Bring shoulder blades slightly back… release.”

**Abdomen (7–8′)**“Gently contract the abdomen… release.”

**Legs and feet (8–10′)**“Pull toes toward you… release… then push away… release.”

**10–12′ Integration**“Remain still, sensing the body softer and heavier.”

**12–14′ Return**“Deep breath, gentle movement of hands and feet.”

**14–15′ Closing**“Open the eyes and notice the body.”

**Operational notes**• No breath-holding.• Skip any muscle group if pain is present.

### ****Script 4 – Guided Visualization****

**“Safe and restorative place in nature”**

**Duration:** 15′**Objective:** Evoke an anchor image of calm and safety.

**Guided text**

**0–1′ Posture and breathing**“Settle into posture, slow and regular breathing.”

**1–3′ Short body scan**“Notice and soften small tensions.”

**3–11′ Visualization**“Imagine a natural place where you feel safe… Observe colors… sounds… scents… touch.With each breath, this place offers calm and clarity.Find an anchor point in this place that represents calm.”

**11–12′ Consolidation**“Fix this place and anchor in memory.”

**12–14′ Return**“Let the image fade gently. Move hands and feet.”

**14–15′ Closing**“Open your eyes when ready and carry the calm with you.”

**Operational notes**• Neutral, non-emotional language.• If visualization is difficult, guide attention through bodily sensations and sounds.

### ****Appendix – Suggested Rotation (12 weeks)****

• Week 1: Mindfulness / PMR• Week 2: Autogenic Training / Visualization• Week 3: Mindfulness / PMR• Week 4: Autogenic Training / Visualization• Week 5: Mindfulness / PMR• Week 6: Autogenic Training / Visualization• Week 7: Mindfulness / PMR• Week 8: Autogenic Training / Visualization• Week 9: Mindfulness / PMR• Week 10: Autogenic Training / Visualization• Week 11: Mindfulness / PMR• Week 12: Autogenic Training / Visualization

**Test administrations:** T0 (pre-start), T1 (end week 6), T2 (end week 12), T3 (follow-up 6–8 weeks).**Instrument order:** I-CAMM → CERQ-IS.**Single session duration:** 15′.**Fidelity checklist:** after each session.
